# Supplementary material for: Prevalence and prognostic impact of comorbidities and peripheral blood indices in sarcomas
Source: PubMed Central journal article supplement — ESMO Open. 2020 Nov 19;5(6):e001035. doi: 10.1136/esmoopen-2020-001035 (PMC7678389; doi:10.1136/esmoopen-2020-001035), 2020-11-19

## Supplemental Materials

Supplemental Table 1. Baseline socio-demographic and clinical characteristics of patients with sarcomas

Supplemental Table 2. Number and incidence rate of all-cause mortality of sarcoma patients overall and in subgroups

Supplemental Table 3. Distribution of death cause in patients with sarcoma

Supplemental Table 4. Cumulative prevalence of comorbid conditions at diagnosis, one year to five years after diagnosis

Supplemental Figure 1. CONSORT Diagram

Supplemental Figure 2. Trends in overall survival at 1-year to 10-year by year of sarcoma diagnosis

Supplemental Figure 3. Restricted cubic spline plots indicating non-linear relationships of NLR and PLR in relation to HR for death

Supplemental Figure 4. Kaplan-Meier curves of all-cause mortality and cancer-specific mortality in bone & articular cartilage and connective & soft-tissue sarcomas

Supplemental Figure 5. Kaplan-Meier curve of CCI in relation to all cause and cancer specific mortality for NLR and PLR

Supplemental Figure 6. Proposed implications on how identification of comorbidities in sarcoma patients may improve treatment outcomes

**SUPPLEMENTAL TABLE 1. Baseline socio-demographic and clinical characteristics of patients with sarcomas**

|                                     | Total<br>(N=3358) | Sarcomas tumor site                           |                                                    |                 |
|-------------------------------------|-------------------|-----------------------------------------------|----------------------------------------------------|-----------------|
|                                     |                   | Bone and<br>articular<br>cartilage<br>(N=661) | Connective<br>and other<br>soft tissue<br>(N=2576) | Both<br>(N=121) |
| <b>Socio-demographic variables</b>  |                   |                                               |                                                    |                 |
| Sex                                 |                   |                                               |                                                    |                 |
| Female                              | 1591 (47.4)       | 334 (50.5)                                    | 1192 (46.3)                                        | 65 (53.7)       |
| Male                                | 1767 (52.6)       | 327 (49.5)                                    | 1384 (53.7)                                        | 56 (46.3)       |
| Age (mean ± SD), year               |                   |                                               |                                                    |                 |
| <18, children and adolescent        | 254 (7.6)         | 116 (17.5)                                    | 122 (4.7)                                          | 16 (13.2)       |
| 18-<40, young adults                | 529 (15.8)        | 132 (20.0)                                    | 365 (14.2)                                         | 32 (26.4)       |
| 40-<65, adults                      | 1418 (42.2)       | 232 (35.1)                                    | 1138 (44.2)                                        | 48 (39.7)       |
| 65-<80, young elderly               | 787 (23.4)        | 140 (21.2)                                    | 630 (24.5)                                         | 17 (14.0)       |
| ≥80, elderly                        | 370 (11.0)        | 41 (6.2)                                      | 321 (12.5)                                         | 8 (6.6)         |
| <b>Clinical characteristics</b>     |                   |                                               |                                                    |                 |
| BMI (mean ± SD), kg/m <sup>2</sup>  | 24.2 ± 4.0        | 24.2 ± 4.0                                    | 24.2 ± 3.9                                         | 24.7 ± 5.6      |
| Weight (mean ± SD), kg              | 61.1 ± 13.0       | 60.1 ± 14.1                                   | 61.3 ± 12.5                                        | 58.3 ± 20.8     |
| SBP (mean ± SD), mmHg               | 133.5 ± 19.2      | 133.1 ± 19.1                                  | 133.6 ± 19.3                                       | 135.3 ± 20.8    |
| DBP (mean ± SD), mmHg               | 74.6 ± 11.3       | 74.6 ± 11.9                                   | 74.6 ± 11.1                                        | 75.6 ± 12.2     |
| HbA1c (mean ± SD), %                | 6.6 ± 1.3         | 6.4 ± 1.1                                     | 6.6 ± 1.3                                          | 6.6 ± 1.2       |
| CCI (mean ± SD)                     |                   |                                               |                                                    |                 |
| CCI                                 |                   |                                               |                                                    |                 |
| 2                                   | 688 (20.5)        | 231 (34.9)                                    | 420 (16.3)                                         | 37 (30.6)       |
| 3                                   | 470 (14.0)        | 84 (12.7)                                     | 357 (13.9)                                         | 29 (24.0)       |
| 4                                   | 569 (16.9)        | 97 (14.7)                                     | 461 (17.9)                                         | 11 (9.1)        |
| 5                                   | 488 (14.5)        | 80 (12.1)                                     | 396 (15.4)                                         | 12 (9.9)        |
| 6                                   | 564 (16.8)        | 89 (13.5)                                     | 456 (17.7)                                         | 19 (15.7)       |
| ≥7                                  | 579 (17.2)        | 80 (12.1)                                     | 486 (18.9)                                         | 13 (10.7)       |
| Serum LDH (mean ± SD), U/L          |                   |                                               |                                                    |                 |
| <106 (for men);<br><103 (for women) | 11 (0.7)          | 1 (0.3)                                       | 10 (0.9)                                           | 0 (0)           |

|                                                            |                   |                   |                   |                   |
|------------------------------------------------------------|-------------------|-------------------|-------------------|-------------------|
| 106-218 (for men);<br>103-199 (for women)                  | 685 (43.7)        | 162 (44.9)        | 492 (43.4)        | 31 (42.5)         |
| >218 (for men);<br>>199 (for women)                        | 872 (55.6)        | 198 (54.8)        | 632 (55.7)        | 42 (57.5)         |
| Absolute Neutrophil count (mean $\pm$ SD), $\times 10^9/L$ | 6.1 $\pm$ 5.2     | 5.9 $\pm$ 3.7     | 6.2 $\pm$ 5.6     | 5.8 $\pm$ 2.6     |
| <1.6                                                       | 57 (1.9)          | 14 (2.3)          | 41 (1.8)          | 2 (1.8)           |
| 1.6-7.0                                                    | 2221 (73.5)       | 452 (73.6)        | 1687 (73.6)       | 82 (71.9)         |
| >7.0                                                       | 742 (24.6)        | 148 (24.1)        | 564 (24.6)        | 30 (26.3)         |
| Absolute Lymphocyte count (mean $\pm$ SD), $\times 10^9/L$ | 1.6 $\pm$ 1.1     | 1.6 $\pm$ 0.8     | 1.6 $\pm$ 1.1     | 1.6 $\pm$ 0.7     |
| <1.1                                                       | 874 (28.9)        | 174 (28.3)        | 672 (29.3)        | 28 (24.6)         |
| 1.1-2.9                                                    | 1980 (65.6)       | 403 (65.6)        | 1494 (65.2)       | 83 (72.8)         |
| >2.9                                                       | 166 (5.5)         | 37 (6.0)          | 126 (5.5)         | 3 (2.6)           |
| Platelet count (mean $\pm$ SD), $\times 10^9/L$            | 281.2 $\pm$ 116.6 | 281.8 $\pm$ 107.8 | 280.6 $\pm$ 119.6 | 290.5 $\pm$ 99.3  |
| <150                                                       | 206 (6.3)         | 39 (6.0)          | 163 (6.5)         | 4 (3.3)           |
| 150-384                                                    | 2626 (79.8)       | 527 (80.6)        | 2000 (79.6)       | 99 (81.8)         |
| >384                                                       | 457 (13.9)        | 88 (13.5)         | 351 (14.0)        | 18 (14.9)         |
| NLR (mean $\pm$ SD)                                        | 5.7 $\pm$ 8.3     | 5.6 $\pm$ 6.4     | 5.8 $\pm$ 8.9     | 4.5 $\pm$ 3.3     |
| <2.5                                                       | 1031 (34.1)       | 204 (33.2)        | 793 (34.6)        | 34 (29.8)         |
| $\geq 2.5$                                                 | 1989 (65.9)       | 410 (66.8)        | 1499 (65.4)       | 80 (70.2)         |
| PLR (mean $\pm$ SD)                                        | 246.4 $\pm$ 246.3 | 240.7 $\pm$ 205.1 | 248.8 $\pm$ 257.9 | 228.8 $\pm$ 208.3 |
| <182                                                       | 1582 (52.4)       | 326 (53.1)        | 1197 (52.2)       | 59 (51.8)         |
| $\geq 182$                                                 | 1438 (47.6)       | 288 (46.9)        | 1095 (47.8)       | 55 (48.2)         |

Note: SBP = systolic blood pressure; DBP = diastolic blood pressure; HbA1c = glycated haemoglobin; CCI = Charlson Comorbidity Index; LDH = lactate dehydrogenase; NLR = neutrophil-lymphocyte ratio PLR = platelet-lymphocyte ratio

**SUPPLEMENTAL TABLE 2. Number and incidence rate of all-cause mortality of sarcoma patients overall and in subgroups**

| Event                                               | Cumulative incidence |       | Incidence rate<br>(Cases/ 100 person-years) |                | Median follow-up periods<br>(Months) |
|-----------------------------------------------------|----------------------|-------|---------------------------------------------|----------------|--------------------------------------|
|                                                     | Cases                | Rate  | Estimate                                    | 95% CI         |                                      |
| Overall (N=3358)                                    | 1754                 | 0.522 | 14.50                                       | (13.83, 15.19) | 26                                   |
| <b>Sex</b>                                          |                      |       |                                             |                |                                      |
| Male                                                | 969                  | 0.548 | 15.72                                       | (14.74, 16.74) | 25                                   |
| Female                                              | 785                  | 0.493 | 13.23                                       | (12.32, 14.19) | 29                                   |
| <b>Age group</b>                                    |                      |       |                                             |                |                                      |
| <18, children and adolescent                        | 73                   | 0.287 | 5.90                                        | (4.62, 7.41)   | 46.5                                 |
| 18-<40, young adults                                | 183                  | 0.346 | 7.45                                        | (6.41, 8.61)   | 40                                   |
| 40-<65, adults                                      | 659                  | 0.465 | 11.70                                       | (10.82, 12.63) | 34                                   |
| 65-<80, young elderly                               | 530                  | 0.673 | 24.18                                       | (22.16, 26.33) | 16                                   |
| ≥80, elderly                                        | 309                  | 0.835 | 53.37                                       | (47.58, 59.66) | 6                                    |
| <b>Sarcoma tumor site</b>                           |                      |       |                                             |                |                                      |
| Bone and articular cartilage                        | 320                  | 0.484 | 12.54                                       | (11.21, 14.00) | 31                                   |
| Connective and other soft tissue                    | 1356                 | 0.526 | 14.87                                       | (14.08, 15.68) | 25                                   |
| <b>NLR</b>                                          |                      |       |                                             |                |                                      |
| <2.5                                                | 357                  | 0.346 | 7.31                                        | (6.57, 8.11)   | 44                                   |
| ≥2.5                                                | 1306                 | 0.657 | 23.97                                       | (22.69, 25.30) | 16                                   |
| <b>PLR</b>                                          |                      |       |                                             |                |                                      |
| <182                                                | 673                  | 0.425 | 10.11                                       | (9.36, 10.91)  | 36.5                                 |
| ≥182                                                | 990                  | 0.688 | 26.90                                       | (25.25, 28.63) | 14                                   |
| <b>Serum LDH, U/L</b>                               |                      |       |                                             |                |                                      |
| 106-218 (for men);<br>103-199 (for women)           | 423                  | 0.618 | 19.65                                       | (17.82, 21.61) | 22                                   |
| <106 or >218 (for men);<br><103 or >199 (for women) | 623                  | 0.706 | 27.66                                       | (25.53, 29.93) | 12                                   |

Note: LDH = lactate dehydrogenase; NLR = neutrophil-lymphocyte ratio PLR = platelet-lymphocyte ratio

**SUPPLEMENTAL TABLE 3. Distribution of death cause in patients with sarcoma**

| Primary Death cause by ICD-10                                                                           | Total<br>(N=1754) | Sarcomas tumor site                           |                                                    |                |
|---------------------------------------------------------------------------------------------------------|-------------------|-----------------------------------------------|----------------------------------------------------|----------------|
|                                                                                                         |                   | Bone and<br>articular<br>cartilage<br>(N=320) | Connective<br>and other<br>soft tissue<br>(N=1356) | Both<br>(N=78) |
| I Certain infectious and parasitic diseases                                                             | 25 (1.43)         | 5 (1.56)                                      | 17 (1.25)                                          | 3 (3.85)       |
| II Neoplasms                                                                                            | 1259 (71.78)      | 227 (70.94)                                   | 975 (71.90)                                        | 57 (73.08)     |
| Sarcoma                                                                                                 | 400 (22.81)       | 93 (29.06)                                    | 280 (20.65)                                        | 27 (34.62)     |
| bone and articular cartilage                                                                            | 127 (7.24)        | 87 (27.19)                                    | 23 (1.70)                                          | 17 (21.79)     |
| other connective and soft tissue                                                                        | 273 (15.56)       | 6 (1.88)                                      | 257 (18.95)                                        | 10 (12.82)     |
| Lung cancer                                                                                             | 101 (5.76)        | 25 (7.81)                                     | 73 (5.38)                                          | 3 (3.85)       |
| Liver cancer                                                                                            | 23 (1.31)         | 7 (2.19)                                      | 15 (1.11)                                          | 1 (1.28)       |
| Mesothelioma                                                                                            | 113 (6.44)        | 0 (0)                                         | 113 (8.33)                                         | 0 (0)          |
| Nasopharynx                                                                                             | 31 (1.77)         | 5 (1.56)                                      | 26 (1.92)                                          | 0 (0)          |
| Uterus                                                                                                  | 32 (1.82)         | 1 (0.31)                                      | 31 (2.29)                                          | 0 (0)          |
| III Diseases of the blood and blood-forming organs and certain disorders involving the immune mechanism | 2 (0.11)          | 1 (0.31)                                      | 1 (0.07)                                           | 0 (0)          |
| IV Endocrine, nutritional and metabolic diseases                                                        | 0 (0)             | 0 (0)                                         | 0 (0)                                              | 0 (0)          |
| V Mental and behavioural disorders                                                                      | 0 (0)             | 0 (0)                                         | 0 (0)                                              | 0 (0)          |
| VI Diseases of the nervous system                                                                       | 1 (0.06)          | 0 (0)                                         | 1 (0.07)                                           | 0 (0)          |
| VII Diseases of the eye and adnexa                                                                      | 0 (0)             | 0 (0)                                         | 0 (0)                                              | 0 (0)          |
| VIII Diseases of the ear and mastoid process                                                            | 0 (0)             | 0 (0)                                         | 0 (0)                                              | 0 (0)          |
| IX Diseases of the circulatory system                                                                   | 52 (2.96)         | 11 (3.44)                                     | 40 (2.95)                                          | 1 (1.28)       |
| X Diseases of the respiratory system                                                                    | 196 (11.17)       | 28 (8.75)                                     | 159 (11.73)                                        | 9 (11.54)      |
| Pneumonia-related mortality                                                                             | 143 (8.15)        | 21 (6.56)                                     | 116 (8.55)                                         | 6 (7.69)       |
| XI Diseases of the digestive system                                                                     | 21 (1.20)         | 2(0.63)                                       | 19 (1.40)                                          | 0 (0)          |
| XII Diseases of the skin and subcutaneous tissue                                                        | 1 (0.06)          | 0 (0)                                         | 1 (0.07)                                           | 0 (0)          |
| XIII Diseases of the musculoskeletal system and connective tissue                                       | 3 (0.17)          | 1 (0.31)                                      | 2 (0.15)                                           | 0 (0)          |
| XIV Diseases of the genitourinary system                                                                | 14 (0.80)         | 2 (0.63)                                      | 11 (0.81)                                          | 1 (1.28)       |
| XV Pregnancy, childbirth and the puerperium                                                             | 1 (0.06)          | 0 (0)                                         | 1 (0.07)                                           | 0 (0)          |
| XVI Certain conditions originating in the perinatal period                                              | 1 (0.06)          | 1 (0.31)                                      | 0 (0)                                              | 0 (0)          |
| XVII Congenital malformations, deformations and chromosomal abnormalities                               | 0 (0)             | 0 (0)                                         | 0 (0)                                              | 0 (0)          |

---

|                                                                                               |            |            |            |          |
|-----------------------------------------------------------------------------------------------|------------|------------|------------|----------|
| XVIII Symptoms, signs and abnormal clinical and laboratory findings, not elsewhere classified | 8 (0.46)   | 3 (0.94)   | 5 (0.37)   | 0 (0)    |
| XIX Injury, poisoning and certain other consequences of external causes                       | 11 (0.63)  | 5 (1.56)   | 6 (0.44)   | 0 (0)    |
| XX External causes of morbidity and mortality                                                 | 0 (0)      | 0 (0)      | 0 (0)      | 0 (0)    |
| XXI Factors influencing health status and contact with health services                        | 0 (0)      | 0 (0)      | 0 (0)      | 0 (0)    |
| XXII Codes for special purposes                                                               | 0 (0)      | 0 (0)      | 0 (0)      | 0 (0)    |
| Uncoded                                                                                       | 159 (9.06) | 34 (10.63) | 118 (8.70) | 7 (8.97) |

---

**Supplemental Table 4. Cumulative prevalence of comorbid conditions at diagnosis, one year to five years after diagnosis**

|                                                   | Cumulative prevalence rate, N (%) |             |             |             |             |             |
|---------------------------------------------------|-----------------------------------|-------------|-------------|-------------|-------------|-------------|
|                                                   | Diagnosis                         | 1-year      | 2-year      | 3-year      | 4-year      | 5-year      |
| Myocardial infarction                             | 36 (1.1)                          | 48 (1.4)    | 53 (1.6)    | 55 (1.6)    | 58 (1.7)    | 58 (1.7)    |
| Other chronic ischemic heart disease              | 127 (3.8)                         | 145 (4.3)   | 150 (4.5)   | 156 (4.6)   | 163 (4.9)   | 167 (5.0)   |
| Congestive heart failure                          | 88 (2.6)                          | 113 (3.4)   | 121 (3.6)   | 126 (3.8)   | 133 (4.0)   | 136 (4.1)   |
| Atrial fibrillation                               | 74 (2.2)                          | 99 (2.9)    | 107 (3.2)   | 115 (3.4)   | 120 (3.6)   | 122 (3.6)   |
| Peripheral vascular disease                       | 7 (0.2)                           | 16 (0.5)    | 21 (0.6)    | 21 (0.6)    | 23 (0.7)    | 24 (0.7)    |
| Cerebrovascular disease                           | 161 (4.8)                         | 193 (5.7)   | 208 (6.2)   | 223 (6.6)   | 234 (7.0)   | 237 (7.1)   |
| Amputation                                        | 5 (0.1)                           | 13 (0.4)    | 15 (0.4)    | 15 (0.4)    | 16 (0.5)    | 16 (0.5)    |
| Dementia                                          | 23 (0.7)                          | 28 (0.8)    | 29 (0.9)    | 30 (0.9)    | 34 (1.0)    | 35 (1.0)    |
| Chronic lung disease                              | 99 (2.9)                          | 109 (3.2)   | 121 (3.6)   | 128 (3.8)   | 132 (3.9)   | 135 (4.0)   |
| Musculoskeletal and chronic Orthopaedic disorders | 1111 (33.1)                       | 1212 (36.1) | 1264 (37.6) | 1301 (38.7) | 1323 (39.4) | 1335 (39.8) |
| Peptic ulcer disease                              | 79 (2.4)                          | 94 (2.8)    | 101 (3.0)   | 105 (3.1)   | 107 (3.2)   | 110 (3.3)   |
| Diabetes mellitus                                 | 329 (9.8)                         | 368 (11.0)  | 389 (11.6)  | 403 (12.0)  | 412 (12.3)  | 421 (12.5)  |
| Moderate to severe chronic kidney disease         | 40 (1.2)                          | 54 (1.6)    | 63 (1.9)    | 69 (2.1)    | 74 (2.2)    | 76 (2.3)    |
| Hemiplegia                                        | 19 (0.6)                          | 26 (0.8)    | 27 (0.8)    | 28 (0.8)    | 33 (1.0)    | 33 (1.0)    |
| Leukemia                                          | 13 (0.4)                          | 16 (0.5)    | 17 (0.5)    | 18 (0.5)    | 20 (0.6)    | 20 (0.6)    |
| Malignant lymphoma                                | 12 (0.4)                          | 21 (0.6)    | 21 (0.6)    | 21 (0.6)    | 21 (0.6)    | 21 (0.6)    |
| Liver disease                                     | 82 (2.4)                          | 131 (3.9)   | 143 (4.3)   | 158 (4.7)   | 162 (4.8)   | 162 (4.8)   |

**Supplemental Figure 1. CONSORT Diagram**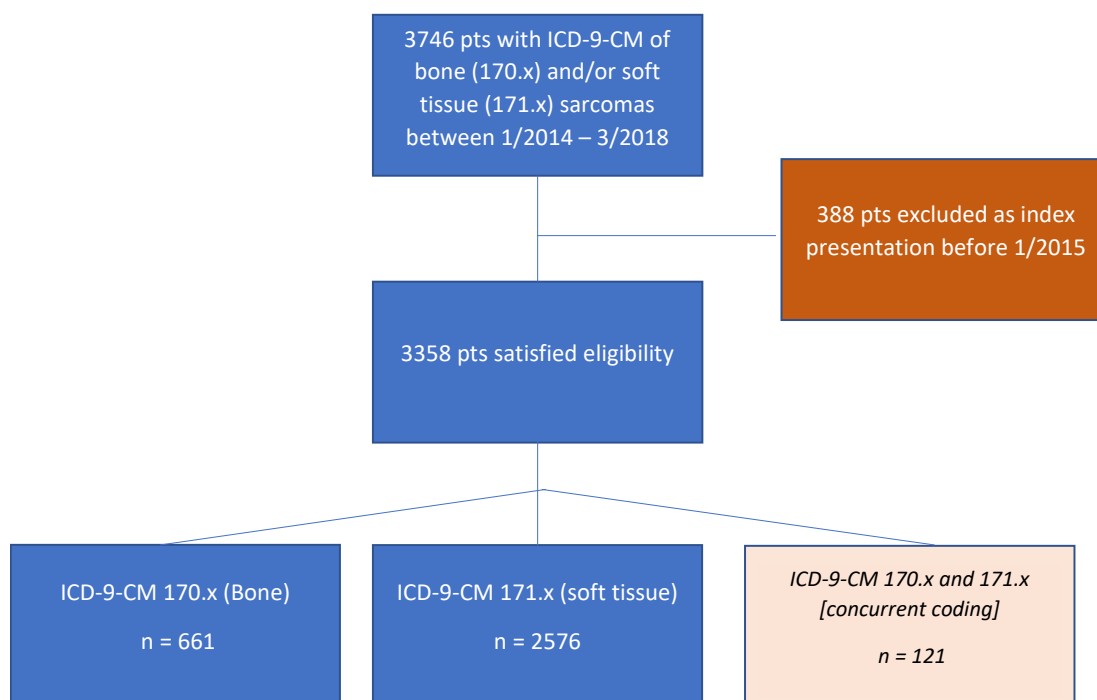



Supplemental Figure 2. Trends in overall survival at 1-year to 10-year by year of sarcoma diagnosis

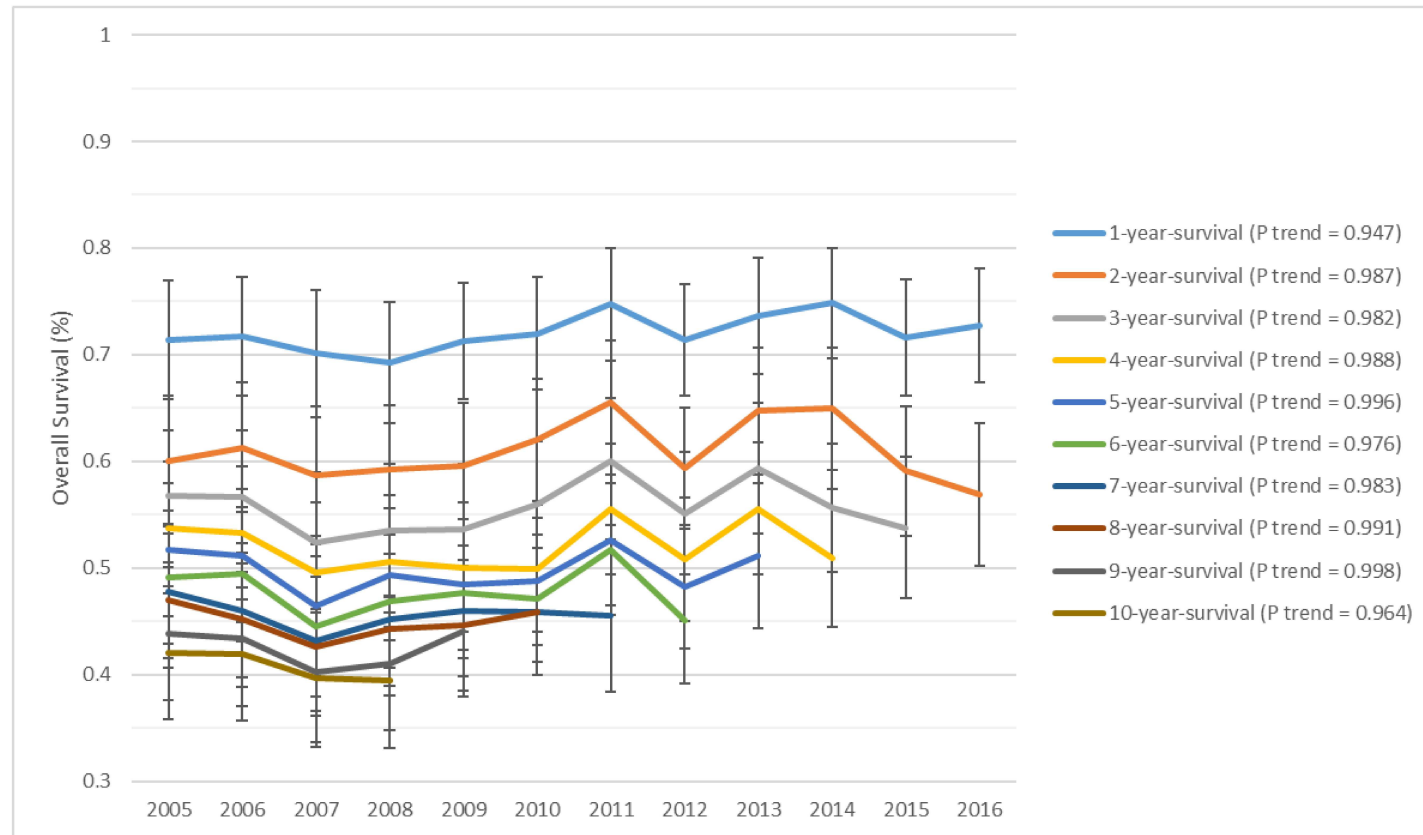

**Supplemental Figure 3. Restricted cubic spine plots indicating non-linear relationships of NLR and PLR in relation to HR for death**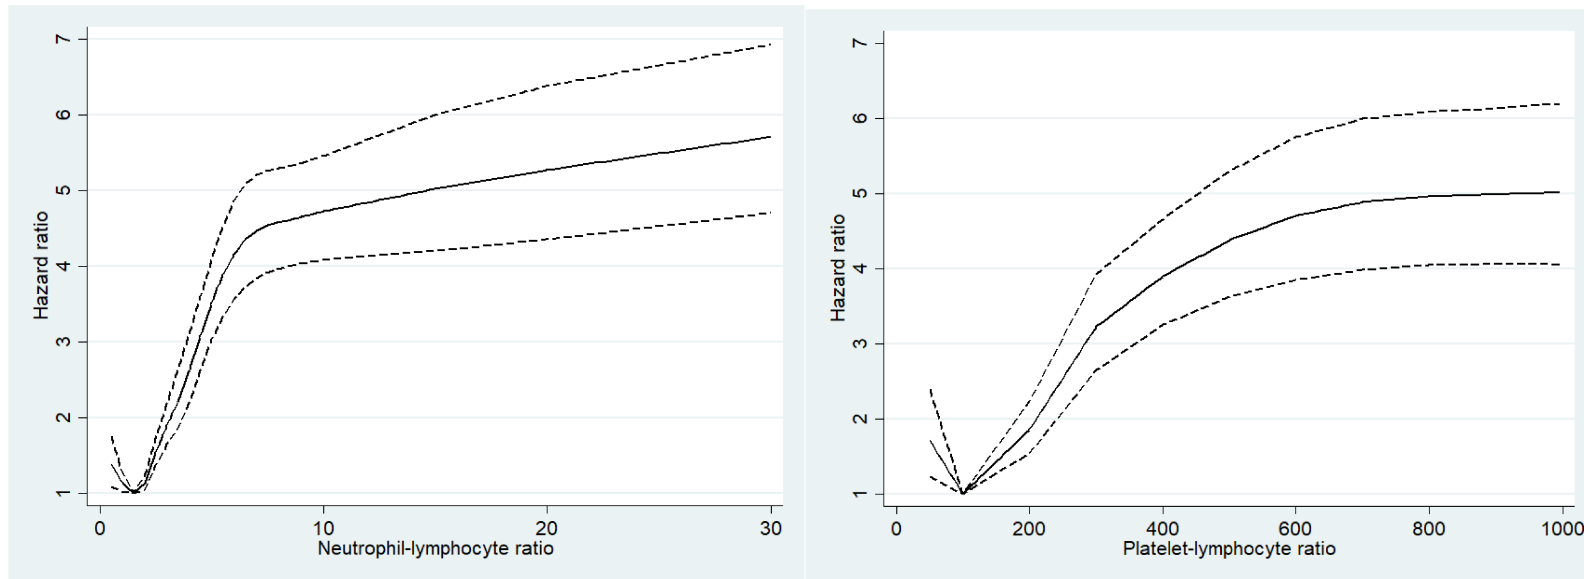

**Supplemental Figure 4. Kaplan-Meier curves of all-cause mortality and cancer-specific mortality in bone & articular cartilage and connective & soft-tissue sarcomas**

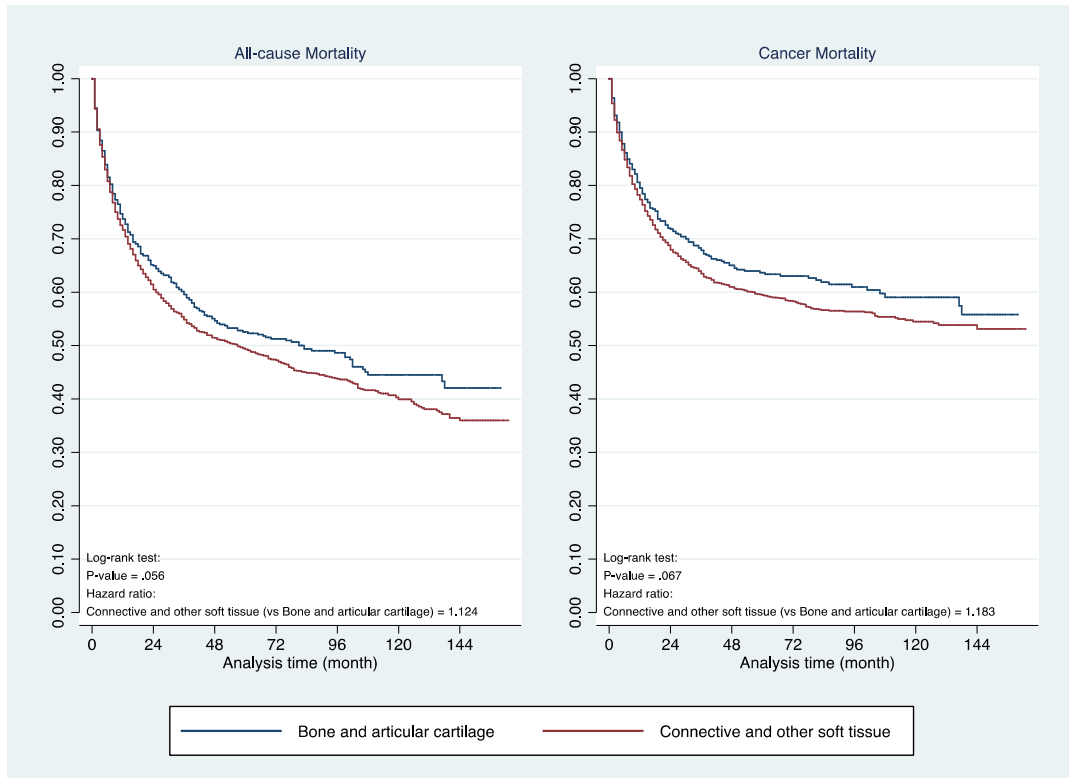

**Supplemental Figure 5. Kaplan-Meier curve of CCI in relation to all cause and cancer specific mortality for NLR and PLR**

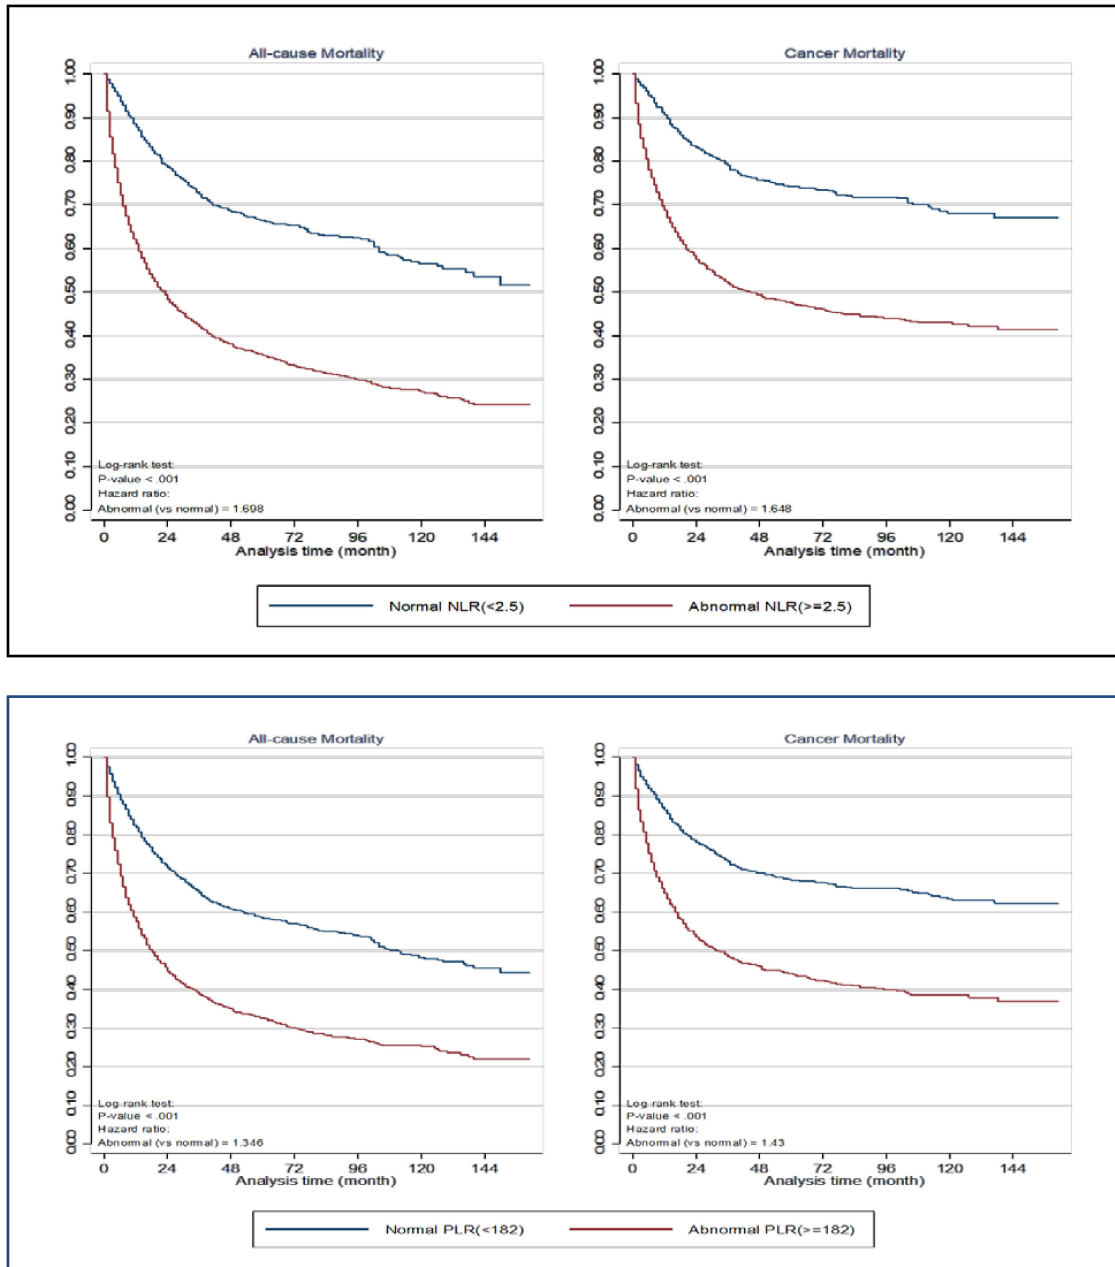

### Supplemental Figure 6. Proposed implications on how identification of comorbidities in sarcoma patients may improve treatment outcomes

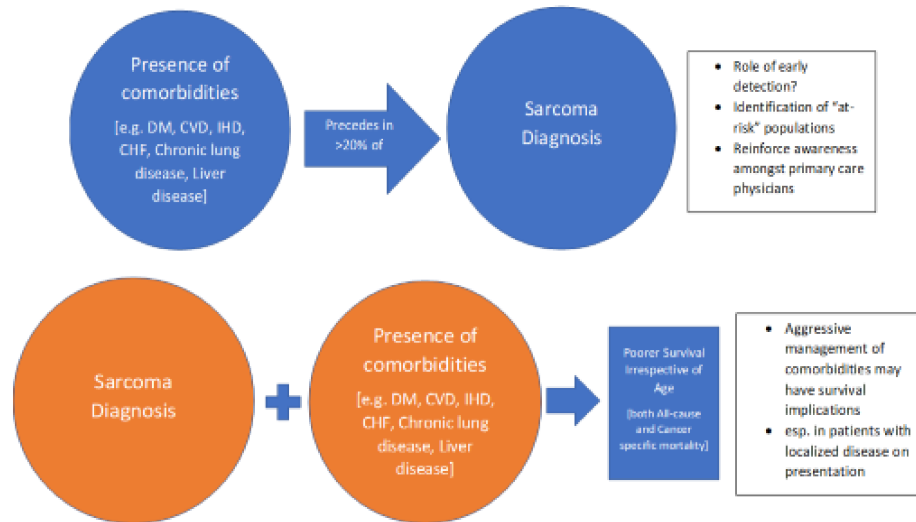

Supplement: esmoopen-2020-001035supp001.pdf [file esmoopen-2020-001035supp001.pdf]
